# Supplementary material
Source: HighWire-hosted journal article supplement (https://www.cmaj.ca/content/suppl/2009/08/24/cmaj.080566)
Supplement: imperial-ham-1-at.pdf [file imperial-ham-1-at.pdf]

## Appendix 1: Sixty destroyed documents

Evelyn S. The transfer of flavouring materials part I: coumariin from pipe tobacco. Report no. Rd. 391-R. Southampton (UK): Group Research and Development Centre, British American Tobacco Company Limited; 1966. Bates: 504001372/1386. Available: <http://legacy.library.ucsf.edu/tid/ovp10f00> (accessed 2009 Aug. 13).

Evelyn S. The transfer of flavouring materials part II: 6-methylcoumarin from pipe tobacco. Southampton (UK): Group Research and Development Centre, British American Tobacco Company Limited; 1966. Bates: 105444420-105444435. Available: <http://legacy.library.ucsf.edu/tid/khe54a99> (accessed 2009 Aug. 13).

Evelyn S, Felton D. The transfer of coumarin part III: The transfer from pipes and cigarettes under various smoking conditions and the retention of coumarin by smokers. Report no. Rd.505-R. Southampton (UK): Group Research and Development Centre, British American Tobacco Company Limited; 1967. Bates: 504001337/1371. Available: <http://legacy.library.ucsf.edu/tid/nvp10f00> (accessed 2009 Aug. 13).

Massey E. Ames mutagenic activity of mainstream condensate of six commercial cigarettes for Imperial Tobacco Ltd (Canada). Project Rio: report no. T153-C, restricted. British American Tobacco Limited; 1984. Bates: 105487577-7599. Available: <http://legacy.library.ucsf.edu/tid/gft67a99/pdf> (accessed 2009 Sept. 9).

Bass DW. Review of biological testing methods: report no. T.90, September 1976. Bates: 402386081-102. Available: <http://bat.library.ucsf.edu/data/f/v/c/fvc54a99/fvc54a99.pdf> (accessed 2009 Aug. 13).

Creighton D. Compensation for changed delivery. Report No. Rd. 1300. Restricted. Southampton (UK): Group Research and Development Centre, British American Tobacco Company Limited; 1976. Bates: 650008449/8480. Available: <http://legacy.library.ucsf.edu/tid/oky14f00> (accessed 2009 Aug. 13).

Ayres CI, Templeton WW. Receptors for nicotine in the central nervous system: I radio ligand binding studies. Report no. Rd. 1960 restricted. Southampton (UK): Group Research and Development Centre, British American Tobacco Company Limited; 1984 Mar. 22. Bates: 650371230-650371265. Available: <http://tobaccodocuments.org/bw/79707.html> (accessed 2009 Aug. 13).

Anderson I, Binns R, Lugton W. Distribution of inhaled smoke particles in the rat lung. Report no. RD. 1566 restricted. Southampton (UK): Group Research and Development Centre, British American Tobacco Company Limited; 1978. Bates: 650010411/0431. Available: <http://legacy.library.ucsf.edu/tid/gjs00f00> (accessed 2009 Aug. 13).

Smith G. Pilot long-term inhalation study (interim report). Report no. RD.1633 restricted. Southampton (UK): Group Research and Development Centre, British American Tobacco Company Limited; 1978. Bates: 650016778-650016797. Available: <http://tobaccodocuments.org/bw/17749.html> (accessed 2009 Aug. 13).

Chakraborty BB, Thornton RE. Analysis of Janus condensate solutions. Report No. RD. 808-R 710729. Southampton (UK): Group Research and Development Establishment, British American Tobacco Company Limited; 1995. Bates: 657006561-657006590. Available: <http://tobaccodocuments.org/bw/11921576.html> (accessed Aug. 13).

Wilkes EB. The first promotion test. Report no. RD. 872-R. Southampton (UK): Group Research and Development Center, British American Tobacco Company Limited; 1972. Bates: 650011164-650011182. Available: <http://tobaccodocuments.org/bw/17553.html> (accessed 2009 Aug. 13).

Wilkes EB. The statistical analysis of an experiment to compare the tumour-promoting activity of the condensate from the cigarettes used in the Janus Long-Term Test B11. [appendix to Report B35]. Frankfurt (Germany): Battelle; 1976 Mar. Bates: 100997280-100997291. Available: <http://bat.library.ucsf.edu/tid/ncg34a99> (accessed 2009 Aug. 13).

Wilkes EB. A statistical analysis of the incidence of tumour-bearing animals in Janus Experiments B6/B7 (Calibration Groups). [appendix to Report B34]. Frankfurt (Germany): Battelle; 1976 Jan. Bates: 650028385-8400. Available: <http://legacy.library.ucsf.edu/tid/bas00f00> (accessed 2009 Jul. 3).

Wilkes EB. A statistical analysis of the incidence of tumour-bearing animals in Janus Experiment B8. Report no. RD/1352. London (UK): British American Tobacco Company Limited; 1976. Bates: 105473470-105473582. Available: <http://bat.library.ucsf.edu/tid/phc34a99> (accessed 2009 Aug. 13).

Wilkes EB. Appendix A: Statistical analysis of the incidence of tumour-bearing animals in Janus Experiment B9, report no. Rd. 1481 restricted. Frankfurt (Germany): Battelle; 1977. Bates: 650030006-650030082. Available: <http://tobacodocuments.org/bw/18127.html> (accessed 2009 Aug. 13).

Wilkes EB. A statistical analysis of the incidence of tumour-bearing animals in Janus Promotion Study B30/31, report no. Rd.1517 restricted. Southampton (UK): Group Research and Development Centre, British American Tobacco Company Limited; 1977. Bates: 650029361-650029407. Available: <http://tobacodocuments.org/bw/18117.html> (accessed 2009 Aug. 13).

Wilkes E. A comparison of the tumorigenic activities of Janus condensates B0, B2 and B4. Southampton (UK): Group Research and Development Centre, British American Tobacco Company Limited; 1977. Bates: 504001185-504001277. Available: <http://legacy.library.ucsf.edu/tid/ijd72d00> (accessed 2009 Aug. 13).

Barnes A, Massey E. Ames mutagenic activity of sidestream condensate of eight commercial cigarettes from the Finnish market. Report no. T.169. Southampton (UK): Group Research and Development Centre, British American Tobacco Company Limited; 1987. Bates: 570216221-570216233. Available: <http://tobacodocuments.org/bw/949798.html> (accessed 2009 Aug. 13).

Massey E, Barnes A. Ames mutagenic activity of sidestream condensate. Comparison of prototype slim cigarettes & six commercial cigarettes from the Swiss market. Report no. T.172. Southampton (UK): Group Research and Development Centre, British American Tobacco Company Limited; 1987. Bates: 570216191-570216204. Available: <http://tobacodocuments.org/bw/949796.html> (accessed 2009 Aug. 13).

Ayres CI. Long-term skin-painting experiments progress report: July 1967. Report no. B-8. London (UK): British American Tobacco Company; 1967. Bates: 105548245-105548316. Available: <http://bat.library.ucsf.edu/tid/lzl34a99> (accessed 2009 Aug. 13).

Wilkes EB. The tumorigenic index. London (UK): British American Tobacco Company; 1968. Bates: 402397893-402397921. Available: <http://bat.library.ucsf.edu/tid/kvc54a99> (accessed 2009 Aug. 13).

Karbe E. The promotion activity of tobacco smoke condensates to mouse skin B9-1 and B9-6 cigarettes. Frankfurt (Germany): Battelle; 1971. Bates: 100997205-100997257. Available: <http://bat.library.ucsf.edu/tid/mcg34a99> (accessed 2009 Aug. 13).

Karbe E, Kiendl J, Königsmann G, et al. Carcinogenicity of smoke condensate to mouse skin: experiment B0. Frankfurt (Germany): Battelle; 1972. Bates: 100996922-100997080. Available: <http://bat.library.ucsf.edu/tid/xyr24a99> (accessed 2009 Aug. 13).

Karbe E, Kiendl J, Königsmann G, et al. Carcinogenicity of smoke condensate to mouse skin: experiment B2. Frankfurt (Germany): Battelle; 1973. Bates: 650027836-650027941. Available: <http://legacy.library.ucsf.edu/tid/ony14f00> (accessed 2009 Aug. 13).

Karbe E. The promotion activity of tobacco smoke condensates to mouse skin: cigarettes B9-2, B9-3, B9-4 and B9-5. Frankfurt (Germany): Battelle; 1972. Bates: 103382587-103382622. Available: <http://bat.library.ucsf.edu/tid/hbt85a99> (accessed 2009 Aug. 13).

Kramer H, Karbe E, Kiendl J, et al. Carcinogenicity smoke condensate to mouse skin: experiment B1. Frankfurt (Germany): Battelle; 1972. Bates: 402434943-402435056. Available: <http://bat.library.ucsf.edu/tid/bqy74a99> (accessed 2009 Aug. 13).

Karbe E, Koster K. Experimental tumorigenesis in the hamster larynx. The promoting activity of inhaled smoke from cigarette B0. Frankfurt (Germany): Battelle; 1974. Bates: 100462460-100462485. Available: <http://bat.library.ucsf.edu/tid/aun24a99> (accessed 2009 Aug. 13).

Karbe E, Kiendl J, Königsmann G, et al. Carcinogenicity of smoke condensate to mouse skin: experiment B3. Frankfurt (Germany): Battelle; 1974. Bates: 650029662-650029757. Available: <http://legacy.library.ucsf.edu/tid/apv23f00> (accessed 2009 Aug. 13).

Karbe E, Klendl J, Königsmann G, et al. Carcinogenicity of smoke condensate to mouse skin: experiment B4. Frankfurt (Germany): Battelle; 1974. Bates: 682638630-682638730. Available: <http://legacy.library.ucsf.edu/tid/gbp90f00> (accessed 2009 Aug. 13).

Kramer H, Karbe E, Kiendl J, et al. Carcinogenicity of smoke condensate to mouse skin: experiment B5. Frankfurt (Germany): Battelle; 1975. Bates: 402434117-402434212. Available: <http://bat.library.ucsf.edu/tid/wqy74a99> (accessed 2009 Aug. 13).

Karbe E, Kiendl J, Königsmann G, et al. Carcinogenicity of smoke condensate to mouse skin: experiments B6 and B7. Frankfurt (Germany): Battelle; 1976. Bates: 650028062-650028231. Available: <http://tobaccodocuments.org/bw/18091.html> (accessed 2009 Aug. 13).

Karbe E, Königsmann G. The promotion activity of tobacco smoke condensate to mouse skin: cigarettes B11/1, B11/2 and B11/3. Frankfurt (Germany): Battelle; 1976. Bates: 100997258-100997291. Available: <http://legacy.library.ucsf.edu/tid/ngc34a99> (accessed 2009 Aug. 13).

Karbe E, Koster K, Gwiessner S, et al. Experimental tumorigenesis in the hamster larynx. The activity of inhaled smoke from cigarette B 12/1 and B12/2. Frankfurt (Germany): Battelle; 1976. Bates: 100997258-100997291. Available: <http://legacy.library.ucsf.edu/tid/mcy14f00/pdf> (accessed 2009 Sept. 9)

Walker D, Jackson M. A study on the tumour-promoting activity of tobacco smoke condensates applied to mouse skin: cigarettes B13/1- 8. Wickham (UK): Wickham Research Laboratories; 1976. Bates: 1193.01. Available: <http://legacy.library.ucsf.edu/tid/xdd72d00> (accessed 2009 Aug. 13).

Gwiebner S, Karbe E, Koster K, et al. Experimental tumorigenesis in the hamster larynx: the effect of inhaled smoke from cigarette B0 on vitamin-A deficient animals. Frankfurt (Germany): Battelle; 1976. Bates: 650029408/9441. Available: <http://legacy.library.ucsf.edu/tid/hoy14f00> (accessed 2009 Aug. 13).

Karbe E, Kiendl J, Königsmann G, et al. Carcinogenicity of smoke condensate to mouse skin: experiment B8. Frankfurt (Germany): Battelle; 1977. Bates: 402446738-402446899. Available: <http://bat.library.ucsf.edu/tid/upm74a99> (accessed 2009 Aug. 13).

Karbe E, Preub W, Wilkes E. The promotion activity of tobacco smoke condensate to mouse skin, dose dependence and interaction of Dmba B9/1 and B9/6 condensates. Frankfurt (Germany): Battelle; 1977. Bates: 1159.01. Available: <http://legacy.library.ucsf.edu/tid/gjd72d00> (accessed 2009 Aug. 13).

Jackson MC, Walker D. A study on the tumour promoting activity of tobacco smoke condensates applied to mouse skin: cigarettes B32/1-6. Wickham (UK): Wickham Research Laboratories; 1977. Bates: 650027421-650027476. Available: <http://tobaccodocuments.org/bw/18080.html> (accessed 2009 Aug. 13).

Chudzinski R, Karbe E, Kiendl J, et al. Carcinogenicity of smoke condensate to mouse skin: experiment B9. Frankfurt (Germany): Battelle; 1977. Bates: 650029758/9919. Available: <http://legacy.library.ucsf.edu/tid/las00f00> (accessed 2009 Aug. 13).

Karbe E, Kiendl J, Königsmann G. Carcinogenicity of smoke condensate to mouse skin: experiment B 10. Frankfurt (Germany): Battelle; 1978. Bates: 650028649-650028708. Available: <http://tobaccodocuments.org/bw/18101.html> (accessed 2009 Aug. 13).

Karbe E, Kiendl J, Königsmann G. Carcinogenicity of smoke condensate to mouse skin: experiment B 11. Frankfurt (Germany): Battelle; 1978. Bates: 650028820650028868. Available: <http://tobaccodocuments.org/bw/18106.html> (accessed 2009 Aug. 13).

Biological activity of cigarette smoke and condensate: results of biological investigations [translation from German]. FE Report no. 261. Bates: 402381098-402381126. Available: <http://bat.library.ucsf.edu/data/b/p/p/bpp84a99/bpp84a99.pdf> (accessed 2009 Aug. 13).

Wilkes EB. The design and analysis of an experiment to compare the tumour-promoting activities of the condensates from cigarettes D184 to D189 inclusive. Report no. RD.1198-R. Southampton (UK): Group Research and Development

Centre. British American Tobacco Limited; 1975. Bates: 105437930-105437968. Available: <http://legacy.library.ucsf.edu/tid/wci57a99/pdf> (accessed 2009 Sept. 7).

Backhurst JD, Creighton DE, Dymond H, et al. Retention of nitric oxide in the human respiratory system. Report no. RD. 828-R 710921. Southampton (UK): Group Research and Development Establishment, British American Tobacco Company Limited; 1971. Bates: 650003248-650003261. Available: <http://tobaccodocuments.org/bw/17273.html> (accessed 2009 Aug. 13).

Baker RR. A review of the genetics and consequences of alpha 1-antitrypsin deficiency. Report no. RD. 1394-U, unclassified. Southampton (UK): Group Research and Development Centre, British American Tobacco Company Limited; 1976. Bates: 650008596/8631. Available: <http://legacy.library.ucsf.edu/tid/ghs00f00/> (accessed 2009 Aug. 13).

Baker RR. A review of the genetics and consequences of alpha 1-antitrypsin deficiency. Report no. RD. 1394-A, unclassified. London (UK): British American Tobacco Company Limited; 1977. Bates: 105472197-105472255. Available: <http://legacy.library.ucsf.edu/tid/mhc34a99/> (accessed 2009 Aug. 13).

Horsewell HG, Phelpsstead J. Triple filters containing mixed adsorbents. Report no. Rd.1632. Southampton (UK): Group Research and Development Centre, British American Tobacco Company Limited; 1978. Bates: 650322793-650322818. Available: <http://tobaccodocuments.org/bw/70208.html> (accessed 2009 Aug. 13).

Prowse R, Read G, Smith G. A comparative inhalation study on smoke from cigarettes with different filters. Report no. RD.1729-C. Southampton (UK): Group Research and Development Centre, British American Tobacco Company Limited; 1980. Bates: 650031977-650032025. Available: <http://tobaccodocuments.org/bw/585032.html> (accessed 2009 Aug. 13).

Kilburn KD, Underwood JG. Preparation and properties of nicotine analogues report No Rd. 953-R. Southampton (UK): Group Research and Development Centre, British American Tobacco Company Limited; 1972. Bates: 650014564/4619. Available: <http://legacy.library.ucsf.edu/tid/qly14f00> (accessed 2009 Aug. 13).

Massey S. Examination of a concept proposed by Gori for rating cigarettes. Southampton (UK): Group Research and Development Centre, British American Tobacco Company Limited; 1981. Bates: 105582425-105582457. Available: <http://legacy.library.ucsf.edu/tid/gjb34a99> (accessed 2009 Aug. 13).

Creighton D. Dr. MAH Russell's "safer cigarettes" study. Report no. RD 1652. Southampton (UK): Group Research and Development Centre, British American Tobacco Company Limited; 1979. Bates: 105517627-105517659. Available: <http://legacy.library.ucsf.edu/tid/uhc34a99> (accessed 2009 Aug. 13).

Greig CC, Hook RG. Investigation of sidestream smoke constituents from four tobacco types. Report no. RD1734. Southampton (UK): Group Research and Development Centre, British American Tobacco Company Limited; 1980. Bates: 650331049/1077b. Available: <http://legacy.library.ucsf.edu/tid/dun23f00/> (accessed 2009 Aug. 13).

Binns R, Smith G, Wilton LV. Changes in the respiratory tract of rats exposed to smoke for 5 or 7 days per week for 6 weeks. Report no. RD.1519. 1977. Bates: 650015088-650015111. Available: <http://legacy.library.ucsf.edu/tid/uly14f00/pdf> (accessed 2009 Sept. 9).

Smith G. Scanning electron microscope study of the response of the larynx and trachea of the rat to smoke exposure. Report no. RD. 1552 Restricted. Southampton (UK): Group Research and Development Centre, British American Tobacco Company Limited; 1977. Bates: 650020970-650020986. Available: <http://tobaccodocuments.org/bw/17889.html> (accessed 2009 Aug. 13).

Smith G. Response of the rat larynx and trachea to smoke during smoke acclimatisation period. Report no. RD. 1553 restricted. Southampton (UK): Group Research and Development Centre, British American Tobacco Company Limited; 1977. Bates: 650020987/1005. Available: <http://legacy.library.ucsf.edu/tid/cny14f00> (accessed 2009 Aug. 13).

Read GA. Studies on mucus production (first report). Report no. RD1589 restricted. Southampton (UK): Group Research and Development Centre, British American Tobacco Company Limited; 1978. Bates: 650010299/0319. Available: <http://legacy.library.ucsf.edu/tid/dly14f00> (accessed 2009 Aug. 13).

Read GA. Acute physiological and biochemical measurements in response to whole smoke, vapour phase and pure CO exposure. Report no. RD. 1640 restricted. Southampton (UK): Group Research and Development Centre, British

American Tobacco Company Limited; 1978. Bates: 650016650-650016687. Available: <http://tobaccodocuments.org/bw/17745.html> (accessed 2009 Aug. 13).

Beven JL, Smith G, Wilton LV. An exposure system for the bioassay of inhaled sidestream cigarette smoke. Report no. Rd.1747-C restricted. Southampton (UK): Group Research and Development Centre, British American Tobacco Company Limited; 1980. Bates: 650031882-650031902. Available: <http://tobaccodocuments.org/bw/18168.html> (accessed 2009 Aug. 13).

Beven JL, Smith G. Characterisation of the conditions necessary for a sidestream smoke inhalation bioassay. Report no. Rd.1921 restricted. Southampton (UK): Group Research and Development Centre, British American Tobacco Company Limited; 1983. Bates: 650000338-650000368. Available: <http://tobaccodocuments.org/bw/17187.html> (accessed 2009 Aug. 13).

Ayres CI, Read GA, Richardson RB, et al. The way in which air ionizers reduce the density of smoke in a closed environment. Report no. Rd.1922 830517. Southampton (UK): Group Research and Development Centre, British American Tobacco Company Limited; 1983. Bates: 650349539-650349586. Available: <http://tobaccodocuments.org/bw/78578.html> (accessed 2009 Aug. 13).
